# Supplementary material for: In situ hydrothermal growth of a dual-ligand metal–organic framework film on a stainless steel fiber for solid-phase microextraction of polycyclic aromatic hydrocarbons in environmental water samples
Source: Royal Society of Chemistry journal article supplement (doi:10.1039/c5ra26656d), 2016-01-01
Supplement: c5ra26656d1.pdf [file c5ra26656d1.pdf]

**Electronic Supplementary Information for**  
In Situ Hydrothermal Growth of Dual-Ligand Metal-Organic Framework Film on  
Stainless Steel Fiber for Solid-Phase Microextraction of Polycyclic Aromatic  
Hydrocarbons in Environmental Water Samples

Shu-Hui Huo<sup>a\*</sup>, Jing Yu<sup>a</sup>, Yan-Yan Fu<sup>b</sup>, and Peng-Xin Zhou<sup>a</sup>

<sup>a</sup> Key Laboratory of Eco-Environment-Related Polymer Materials of Ministry of Education, College of Chemistry and Chemical Engineering, Northwest Normal University, Lanzhou 730070, China

<sup>b</sup> School of Medical Imaging, Tianjin Medical University, Tianjin 300203, China

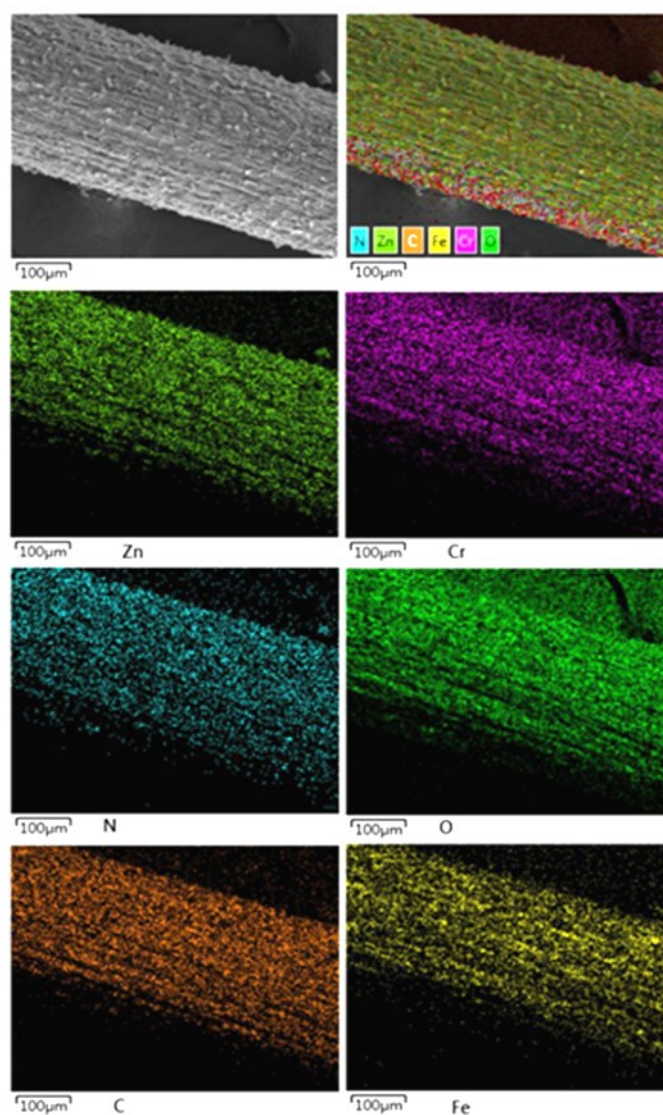

Fig.S1 EDS elemental mapping images of bio-MOF-1 film coated stainless steel fiber.

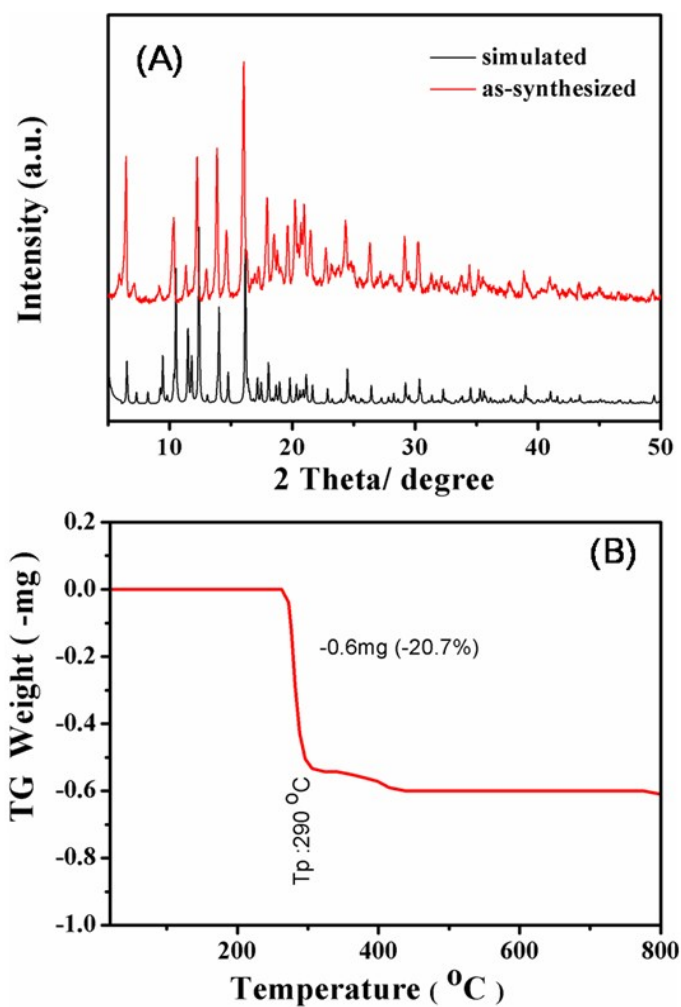

Fig. S2 (A) XRD patterns of the as-synthesized and simulated bio-MOF-1; (B) TGA curve of bio-MOF-1.

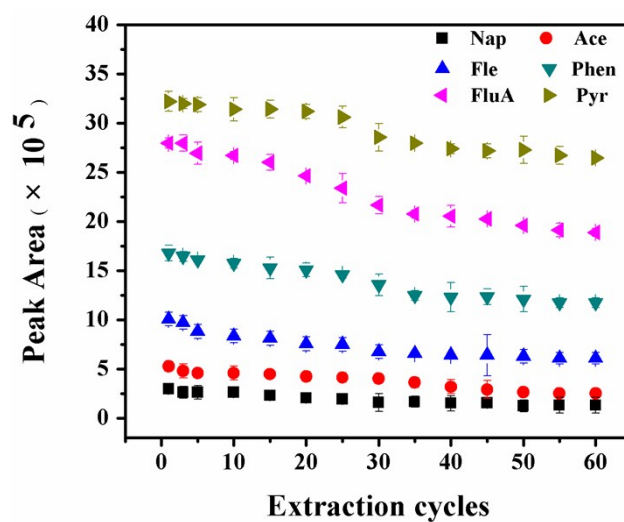

Fig. S3 Robustness of bio-MOF-1 coating in water sample for studied PAHs at concentration of  $50 \mu\text{g L}^{-1}$ .
